# Supplementary material
Source: PubMed Central journal article supplement (PMC11027717)
Supplement: 262_2020_2629_MOESM1_ESM.pdf [file 262_2020_2629_MOESM1_ESM.pdf]

**Supplementary Table 1** Clinicopathological features of 36 patients with esophageal squamous cell carcinoma

| <b>Clinical feature</b>      | <b>N=36</b> |
|------------------------------|-------------|
| <b>Gender</b>                |             |
| Male                         | 13          |
| Female                       | 23          |
| <b>Age ( years )</b>         |             |
| <60                          | 9           |
| ≥60                          | 27          |
| <b>Tumor infiltration</b>    |             |
| Lamina propria or submucosa  | 3           |
| Muscularis propria           | 12          |
| Adventitia                   | 19          |
| Adjacent structures          | 2           |
| <b>Lymph node metastasis</b> |             |
| Present                      | 14          |
| Absent                       | 22          |
| <b>Pathological stage</b>    |             |
| I, II                        | 23          |
| III, IV                      | 13          |

**Supplementary Table 2** Fluorophore-conjugated antibodies

| Antibody                 | Fluorophore           | Manufacturer |
|--------------------------|-----------------------|--------------|
| Human anti-CD3           | APC-CY7, FITC, PE-CY7 | BioLegend    |
| Human anti-CD56          | PE, PE-CY7, APC-CY7   | BioLegend    |
| Human anti-CD39          | PE, APC               | BioLegend    |
| Human anti-GzmB          | FITC                  | BioLegend    |
| Human anti-IFN- $\gamma$ | APC                   | BioLegend    |
| Human anti-Ki67          | APC, FITC             | BioLegend    |
| Human anti-CD73          | FITC                  | BioLegend    |
| Human anti-Tim-3         | PE                    | BioLegend    |
| Human anti-PD-1          | FITC                  | BioLegend    |
| Human anti-TIGIT         | PE                    | BioLegend    |

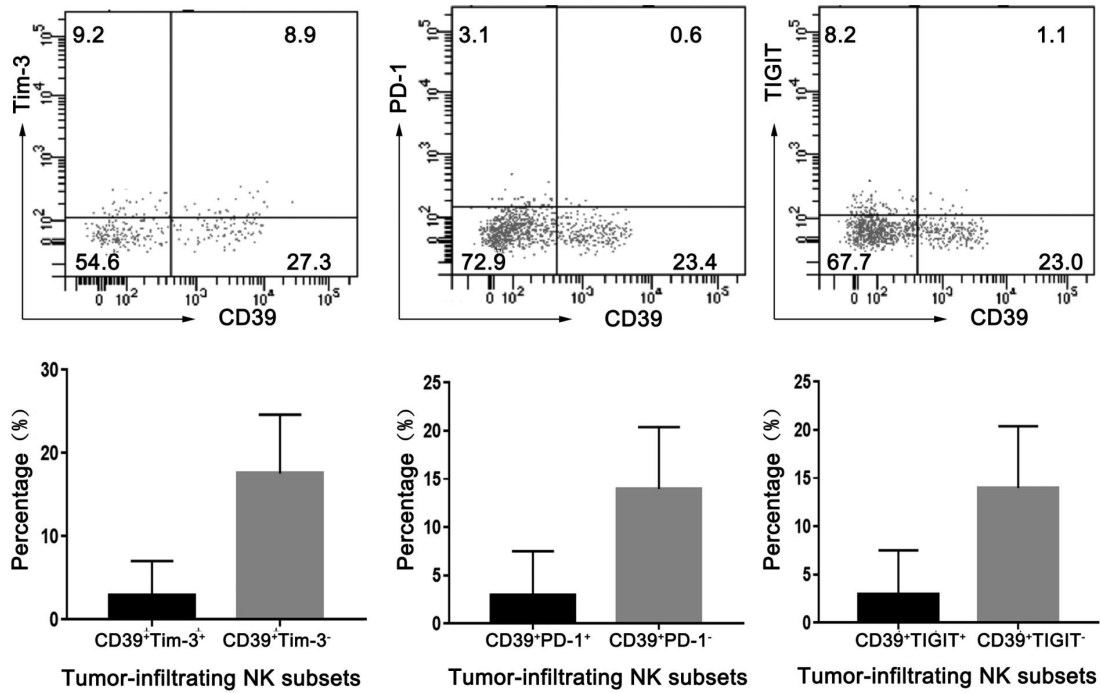

**Supplementary Fig. 1** Characterization of other inhibitory receptors along with CD39 on tumor-infiltrating CD39<sup>+</sup> NK cells from ESCC patients (n=4). (Top panel) Representative FACS plots of other inhibitory receptors (Tim-3, PD-1 and TIGIT) along with CD39 on tumor-infiltrating NK cells from a ESCC patient. (Bottom panel) Statistical analysis of other inhibitory receptors (Tim-3, PD-1 and TIGIT) on CD39<sup>+</sup> NK cell subset and CD39<sup>-</sup> NK cell subset.

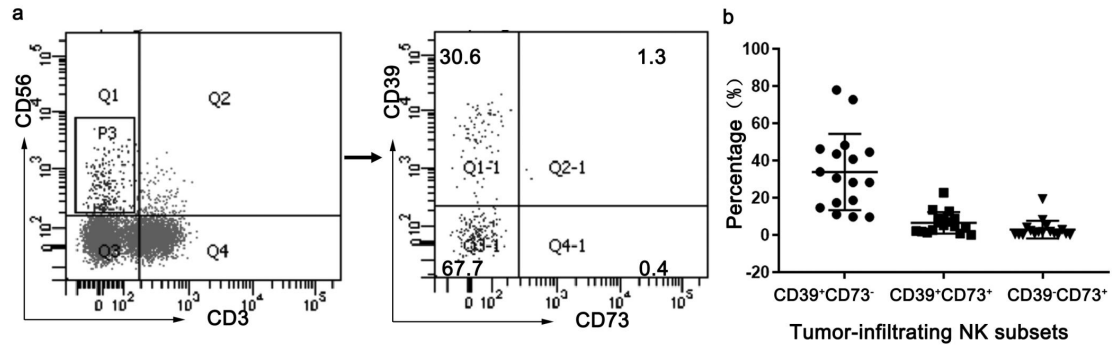

**Supplementary Fig. 2** Co-expression of CD39 and CD73 on tumor-infiltrating NK cells from ESCC patients (n=17). (a) Gating strategy shown by representative FACS plots. (b) Statistical analysis of tumor-infiltrating NK cell subsets.
